# Supplementary material for: “Below 58 BPM,” involving real-time monitoring and self-medication practices in music performance through IoT technology
Source: Frontiers journal article supplement (doi:10.3389/fcomp.2024.1187933), 2024-02-21
Supplement: Table_1.XLSX [file Table_1.XLSX]

## Sheet: fonte dati
seconds	value	device	trial	id
0	90	no	1	1_no	758	151.6
10	95	no	1	1_no	744	148.8
20	100	no	1	1_no	766	159
30	105	no	1	1_no	794	158.8
40	110	no	1	1_no	807	161.4
50	115	no	1	1_no		155.92
60	143	no	1	1_no
0	88	yes	1	1_yes
10	93	yes	1	1_yes	731	146.2
20	98	yes	1	1_yes	759	151.8
30	103	yes	1	1_yes	752	150.4
40	108	yes	1	1_yes	763	152.6
50	113	yes	1	1_yes	765	153
60	128	yes	1	1_yes
0	88	no	2	2_no
10	93	no	2	2_no
20	98	no	2	2_no
30	103	no	2	2_no
40	108	no	2	2_no
50	113	no	2	2_no
60	141	no	2	2_no
0	92	yes	2	2_yes
10	97	yes	2	2_yes
20	102	yes	2	2_yes
30	107	yes	2	2_yes
40	112	yes	2	2_yes
50	117	yes	2	2_yes
60	132	yes	2	2_yes
0	90	no	3	3_no
10	97	no	3	3_no
20	102	no	3	3_no
30	107	no	3	3_no
40	110	no	3	3_no
50	118	no	3	3_no
60	142	no	3	3_no
0	89	yes	3	3_yes
10	94	yes	3	3_yes
20	101	yes	3	3_yes
30	105	yes	3	3_yes
40	112	yes	3	3_yes
50	121	yes	3	3_yes
60	130	yes	3	3_yes
0	96	no	4	4_no
10	99	no	4	4_no
20	107	no	4	4_no
30	110	no	4	4_no
40	117	no	4	4_no
50	121	no	4	4_no
60	144	no	4	4_no
0	94	yes	4	4_yes
10	97	yes	4	4_yes
20	103	yes	4	4_yes
30	107	yes	4	4_yes
40	111	yes	4	4_yes
50	118	yes	4	4_yes
60	133	yes	4	4_yes
0	98	no	5	5_no
10	102	no	5	5_no
20	106	no	5	5_no
30	110	no	5	5_no
40	115	no	5	5_no
50	125	no	5	5_no
60	151	no	5	5_no
0	92	yes	5	5_yes
10	97	yes	5	5_yes
20	102	yes	5	5_yes
30	109	yes	5	5_yes
40	113	yes	5	5_yes
50	118	yes	5	5_yes
60	134	yes	5	5_yes

## Sheet: summary
time	average		maximum		minimum
	no device	with device	no device	with device	no device	with device
0	92.4	91	98	94	88	88
10	97.2	95.6	102	97	93	93
20	102.6	101.2	107	103	98	98
30	107	106.2	110	109	103	103
40	112	111.2	117	113	108	108
50	118.4	117.4	125	121	113	113
60	144.2	131.4	151	134	141	128

## Sheet: Pivot Table 1
	device	Data
	no			yes
seconds	Average - value	Min - value	Average - value	Average - value	Min - value	Average - value
0	92.4	88	92.4	91	88	91
10	97.2	93	97.2	95.6	93	95.6
20	102.6	98	102.6	101.2	98	101.2
30	107	103	107	106.2	103	106.2
40	112	108	112	111.2	108	111.2
50	118.4	113	118.4	117.4	113	117.4
60	144.2	141	144.2	131.4	128	131.4
		12.6866
		9.74125
		1.53846

## Sheet: Detail2-60-no
seconds	value	device	trial	id
60	143	no	1	1_no
60	141	no	2	2_no
60	142	no	3	3_no
60	144	no	4	4_no
60	151	no	5	5_no

## Sheet: Detail1-60-no
seconds	value	device	trial	id
60	143	no	1	1_no
60	141	no	2	2_no
60	142	no	3	3_no
60	144	no	4	4_no
60	151	no	5	5_no
